# Supplementary material
Source: publisher figshare collection journal article supplement (https://gsapubs.figshare.com/ndownloader/files/28157184)
Supplement: Supplementary file 1 [file 28157184]

## Sheet: Sheet1
Table S3 LA-ICP-MS zircon trace element compositions (ppm)
Rock type		Biotite granites																										Granite porphyry dykes													MMEs
Sample		ZK3-1-27													ZK10-1-32													GF-05													GF-03
		1	2	3	4	5	6	7	8	9	10	11	12		1	2	3	4	5	6	7	8	9	10	11	12		1	2	3	4	5	6	7	8	9	10	11	12		1	2	3	4	5	6	7	8	9
206Pb/238U age (Ma)		91.4719	96.1178	96.2084	89.3306	97.4623	92.5922	97.6779	91.2211	93.4794	93.9151	92.4833	95.1079		93.2815	94.1218	93.3008	96.3067	95.1443	92.0486	89.5877	92.8572	98.6355	91.1142	92.4552	-		82.4617	82.6756	83.3261	84.7807	84.9283	87.7545	87.3029	83.1763	89.4026	87.3694	88.1783	81.8197		82.6865	89.0296	85.8613	86.3256	84.0694	86.4055	85.4512	86.7498	84.9281
Li		0.586275	2.04461	0.5177	-	0.128732	9.04801	0.697747	3.92554	0.32086	0.552086	1.83534	3.98717		0.160779	1.24542	2.95576	1.81051	1.5082	1.86784	2.47025	2.46992	1.1353	1.53263	1.25973	1.44607		1.50508	4.87663	2.20763	41.8183	3.56471	7.20508	n.a.	n.a.	n.a.	n.a.	n.a.	n.a.		n.a.	n.a.	n.a.	n.a.	n.a.	n.a.	n.a.	n.a.	n.a.
Be		0.539846	0.630929	0.074718	0.162895	1.2541	1.76835	0.243033	3.09463	0.0764288	0.0758232	0.0701998	3.18711		0.0709108	-	0.213983	0.147126	0.158813	0.299716	0.0751411	0.0759264	0.0775492	1.00675	0.631368	-		1.00697	1.35111	0.951537	3.20745	11.3566	1.5157	n.a.	n.a.	n.a.	n.a.	n.a.	n.a.		n.a.	n.a.	n.a.	n.a.	n.a.	n.a.	n.a.	n.a.	n.a.
Na		40.1556	26.7431	6.09301	10.3129	12.3121	14.0051	6.14554	16.7398	-	5.57746	7.70291	21.7707		-	-	-	-	22.0586	6.58386	28.215	-	-	22.4283	8.12646	5.8238		7.29853	36.2427	14.1119	55.9094	47.5211	35.7543	n.a.	n.a.	n.a.	n.a.	n.a.	n.a.		n.a.	n.a.	n.a.	n.a.	n.a.	n.a.	n.a.	n.a.	n.a.
P		1000	1830	971.88	667.183	706.924	3720	1860	3970	888.435	2070	3310	2840		683.696	1670	2490	1820	2280	2140.26	3160	2120	1300	1530.02	1480	931.704		1970.4	2730	2820	934.021	2900	2580	n.a.	n.a.	n.a.	n.a.	n.a.	n.a.		n.a.	n.a.	n.a.	n.a.	n.a.	n.a.	n.a.	n.a.	n.a.
K		17.7741	11.899	6.25144	18.4589	14.2504	31.5653	8.81939	46.8896	-	4.89016	1.32623	5.0313		0.869874	-	-	3.13259	-	7.15464	-	0.120471	-	3.49438	20.0914	-		3.89378	325.393	6.96946	491.865	4.51638	170.652	n.a.	n.a.	n.a.	n.a.	n.a.	n.a.		n.a.	n.a.	n.a.	n.a.	n.a.	n.a.	n.a.	n.a.	n.a.
Ca		-	-	-	176.45	396.489	124.8	212.39	148.704	-	0	53.0972	120.419		183.416	7.93647	82.874	-	174.614	23.4321	-	-	-	98.5359	-	96.3559		324.025	-	134.94	1490	242.072	194.693	n.a.	n.a.	n.a.	n.a.	n.a.	n.a.		n.a.	n.a.	n.a.	n.a.	n.a.	n.a.	n.a.	n.a.	n.a.
Ti		7.20991	3.38786	7.17786	11.7134	9.34912	4.90377	9.73117	8.04218	6.18542	6.14393	6.65651	6.67207		8.0801	2.02435	1.27078	2.89835	7.05142	3.67119	2.68031	0.939661	5.37824	2.3479	4.15846	9.18611		6.65733	9.13774	6.69974	14.6381	12.9936	11.1513	12.8433	8.72332	5.11417	11.1742	3.68326	9.75031		14.6108	11.0159	14.8665	12.1325	11.3888	14.8933	11.6587	10.3748	11.5535
Y		2560	2860	1260	1470	2850	5360	2740	4980	1300	2900	4259.59	2759.54		1260	2230	3220	2660	3190	3030	4540	2850	1880	2780	2690	1369.98		3130	3990	4310	2640	3410	4150	n.a.	n.a.	n.a.	n.a.	n.a.	n.a.		n.a.	n.a.	n.a.	n.a.	n.a.	n.a.	n.a.	n.a.	n.a.
Nb		6.56125	7.59565	6.39285	3.78541	10.2394	20.2486	7.06923	20.1986	5.57548	5.55893	18.3414	16.5141		4.54596	7.97868	10.0047	6.80084	6.80582	10.8725	12.2616	9.02196	7.33502	8.41815	7.70234	7.10626		31.2954	31.2628	32.4101	46.961	53.244	31.4647	32.4474	12.4382	35.4376	29.668	20.6998	9.98973		5.65217	5.25488	8.19748	7.26991	7.08368	7.98529	3.35274	3.74403	5.2396
Hf		10400	14600	12100	11100	9840	16400	12700	16900	12100	13600	15600	18600		12400	14600	14800	15300	15700	15400	15100	14800	13400	14300	13300	12200		13500	13800	13900	10700	15600	16800	9680	12400	12500	14800	13700	8000		8170.1	8780	8010	7790	7639.62	7650	8940	7990	7840
Ta		2.47967	6.91452	2.85072	1.92582	2.89187	14.3391	4.74451	15.43	3.32456	3.43932	14.4047	18.9923		3.21984	8.9513	11.5	6.33611	6.77919	10.4373	11.4685	9.59051	6.29896	7.21125	5.4731	4.71621		14.1232	13.2528	17.6363	15.2353	25.0022	18.4432	8.3997	6.72919	15.0764	12.8546	12.0306	3.57538		2.53167	2.20597	3.16546	3.10895	3.08543	3.04333	1.27984	1.86013	2.17087
Th		556.437	229.156	180.386	215.059	541.909	349.008	257.001	195.645	144.799	94.9828	209.04	159.745		151.485	139.549	102.78	134.619	183.382	189.469	166.773	171.944	142.663	223.337	275.89	186.5		450.338	607.958	225.963	1800	226.077	1370	927.3	772.1	514.2	540	408.4	1000	473	279.869	223.987	342.084	344.425	326.218	382.38	55.6157	143.663	234.701
U		497.301	2520	828.43	348.265	623.224	6430	1890	7960	611.771	909.675	4369.77	5739.89		429.073	3570	4570	3949.68	5350.35	4540	4830	4320	1570	1949.65	2570	1300		4809.81	5190	5900	2719.92	6590	7750	1160	2570	3490	5800	5100	375.163		251.401	220.921	302.688	301.089	282.416	327.78	87.362	149.39	216.924
La		0.123547	0.0451083	0.266853	0.0924132	0.442101	0.184765	0.907345	0.638196	-	0.0214446	-	0.489866		0.110746	0.0226081	0.115263	0.0111632	0.284184	0.109697	0.055727	0.119763	0.0333498	0.212719	0.0225669	0.281539		0.64891	0.591554	0.447669	1.63286	2.94881	0.282977	0.0838525	1.24556	0.607826	1.16133	0.854073	0.136266		0.0384769	0.0221841	0.141812	0.433373	0.0900577	0.106742	0.01	0.0105923	0.0847285
Ce		21.5131	4.99378	10.958	13.4281	18.8283	5.08624	11.4672	4.80888	9.00968	2.51101	2.15314	6.69766		10.9301	1.92856	1.44043	1.70823	6.75636	2.26683	1.87749	1.93989	4.2627	4.58781	9.34311	11.3154		11.3626	8.71763	13.9779	89.1786	24.4503	32.1949	53.951	21.2125	16.8334	9.99662	8.61112	16.7222		11.3834	10.7796	12.6915	12.0704	10.9115	12.9493	6.24165	8.41993	10.1015
Pr		0.327788	0.191419	0.112043	0.260681	1.20259	0.458735	0.669061	0.504754	0.0918676	0.0524549	0.116638	0.650078		0.114535	0.0559899	0.051885	0.0317383	0.192768	0.102302	0.0630293	0.0695222	0.0225272	0.0725144	0.147122	0.0899026		0.876519	1.05776	0.74682	1.62881	3.27172	0.670897	0.613835	0.731371	0.349894	1.72331	0.640565	0.911852		0.704398	0.286284	0.659061	0.698193	0.610024	0.639227	0.0403651	0.253232	0.44032
Nd		8.08919	2.64104	1.57001	3.26545	10.1848	3.23271	3.601	5.25648	1.40283	0.79557	1.41878	3.45448		1.20507	0.279065	0.512552	0.487176	1.68206	0.754427	0.745205	1.07238	0.752876	1.97254	2.46483	1.20033		6.54978	6.99941	4.4228	13.1951	17.1608	9.34718	8.17613	6.80958	2.57386	8.51792	3.60309	11.7125		6.82597	4.73982	7.21341	7.9046	8.41164	7.44017	0.919228	4.26334	6.1193
Sm		11.5463	4.29747	2.47197	6.69372	18.5371	7.21939	5.24864	8.13492	2.63149	3.68578	3.82419	6.44083		2.01903	2.66563	2.36119	2.05186	4.10438	3.69275	3.58979	2.15197	2.67978	4.19472	4.70386	3.39385		6.98559	10.5202	8.21956	16.6828	11.7053	14.2514	11.2692	12.2233	4.84917	8.13702	4.16221	14.9209		9.54294	7.31826	9.66315	9.9022	10.1434	11.4115	1.1233	5.09484	8.35014
Eu		0.760422	0.342707	0.262003	0.582242	1.79902	0.685745	0.214662	0.685165	0.238047	0.252098	0.242031	0.586702		0.315342	0.0307146	0.168501	0.0811681	0.537167	0.146475	0.097775	0.222075	0.0647367	0.119764	0.389015	0.425002		0.499369	0.628887	0.572446	1.66717	0.692395	0.597739	1.66704	0.486048	0.323208	0.33842	0.267655	2.45062		1.61733	1.008	1.38043	1.61623	1.53898	1.78513	0.254635	0.820126	1.40743
Gd		63.1197	30.4678	19.7662	32.0957	87.1821	54.3857	37.4604	47.3092	20.5325	29.9099	35.1357	32.7995		21.737	17.8029	21.312	20.1132	34.027	26.5462	39.3277	25.7148	18.6092	32.173	35.5545	20.5445		37.1124	49.0633	45.3105	57.3278	41.1181	66.9959	51.2277	59.1241	32.2054	32.2728	23.162	61.184		36.6181	28.4685	39.9124	44.3576	45.1531	48.5627	7.30572	20.864	34.3072
Tb		21.0765	14.8921	8.12689	11.4403	28.0293	29.9481	16.7579	27.6645	8.10508	15.9083	20.1807	16.5742		8.42777	10.6703	14.3563	12.7581	16.7608	15.3319	22.8394	13.6793	10.0889	16.0768	15.4341	8.15186		17.401	24.5545	24.641	20.1251	20.3945	28.2336	16.7365	22.6473	15.1534	16.8361	11.6217	18.9105		12.4337	9.07858	12.8711	13.9334	13.7025	14.4575	2.40492	6.74157	10.8428
Dy		241.172	217.827	109.208	134.238	293.381	422.428	227.011	420.607	108.056	229.171	324.657	228.349		109.475	160.345	229.083	195.595	249.207	228.856	345.688	204.828	140.764	220.348	217.953	109.128		253.402	336.235	336.586	237.751	287.522	374.504	192.388	262.664	213.49	237.401	169.513	199.193		134.371	101.935	148.369	155.1	156.472	164.781	28.2625	75.5506	119.52
Ho		90.6976	91.0236	42.2747	50.4808	99.5303	180.165	91.2601	157.94	41.7693	92.7648	136.669	85.6223		44.2419	73.3003	101.934	85.6793	102.274	98.5127	143.341	92.2212	61.4997	91.7739	90.0788	44.3501		100.426	135.178	138.605	85.4317	109.186	138.182	70.0808	93.23	88.9303	97.8526	69.7607	69.5813		48.2368	36.8528	51.872	55.4517	54.0143	58.1944	10.7883	26.5342	42.5593
Er		370.828	445.134	195.031	218.859	398.294	934.36	434.341	765.113	202.754	448.121	714.875	424.148		200.402	384.234	561.881	451.997	529.696	503.891	686.887	497.032	309.171	451.77	438.387	216.456		520.679	652.048	701.877	386.334	559.822	639.248	306.944	405.243	445.954	517.957	363.671	293.423		201.421	159.582	229.094	238.899	231.373	246.013	51.0557	117.449	180.304
Tm		74.4869	106.784	47.4087	46.4748	76.9995	231.088	100.096	185.616	45.942	100.825	182.382	114.617		45.4275	102.911	149.897	120.237	135.071	131.246	160.474	130.227	76.6822	107.762	106.964	50.3485		132.497	156.946	177.563	86.6936	152.748	168.168	64.7002	88.6108	107.56	136.284	92.7157	59.7693		42.3299	33.2195	46.467	49.124	48.048	50.3121	11.0703	24.6014	37.2762
Yb		667.633	1020	455.577	411.322	678.22	2410	1009.64	1880	444.379	935.339	1890	1289.63		437.99	1070	1690	1260	1430	1410	1580	1390	794.756	1050	1070	506.792		1370	1550.25	1780	827.403	1650.38	1790	593.396	833.874	1080	1450	992.058	545.326		387.827	310.528	436.081	454.156	444.417	468.022	108.923	229.738	346.791
Lu		125.103	193.392	83.642	79.2672	126.122	473.829	186.576	335.571	87.7	179.742	368.403	245.897		86.4827	221.792	336.932	263.611	282.751	288.505	293.12	293.092	157.358	208.046	209.657	102.044		279.907	302.215	360.306	156.281	328.396	360.071	119.626	160.898	221.225	303.362	206.514	110.093		77.2014	62.14	86.2874	91.5526	89.1063	92.8965	22.9895	47.9064	69.5247
ΣREE		1696.48	2132.03	976.675	1008.5	1838.75	4753.07	2125.25	3839.85	972.612	2039.1	3680.06	2455.95		968.879	2046.04	3110.04	2414.36	2793.34	2709.96	3278.11	2652.37	1576.74	2189.11	2201.1	1074.52		2738.35	3235	3593.28	1981.33	3209.79	3622.75	1490.86	1969	2230.06	2821.84	1947.16	1404.33		970.551	765.959	1082.7	1135.2	1113.99	1177.57	251.389	568.247	867.629
Eu/Eu*		0.0861141	0.0915628	0.11459	0.121442	0.136812	0.105802	0.0468024	0.106775	0.0990069	0.0734042	0.0638339	0.123406		0.145524	0.0136309	0.0726188	0.0386273	0.138963	0.0452283	0.0251575	0.0912668	0.028026	0.0315176	0.0919636	0.155604		0.0948165	0.0846262	0.0906848	0.164812	0.096487	0.05914	0.212115	0.0552747	0.0790692	0.0638452	0.0833391	0.247961		0.264505	0.213499	0.214895	0.235764	0.219847	0.231831	0.271746	0.243187	0.254221
Ce/Ce*		26.2105	13.1763	15.5378	21.2118	6.33105	4.28341	3.60848	2.07736	-	18.3561	-	2.90996		23.7943	13.2902	4.5668	22.2508	7.07749	5.24643	7.76709	5.21241	38.1303	9.0568	39.7559	17.4381		3.69394	2.70204	5.92706	13.4071	1.93	18.1163	58.3042	5.44911	8.94952	1.73253	2.8544	11.6312		16.953	33.164	10.1784	5.38007	11.414	12.1545	72.6248	39.8601	12.8224
Ce4+/Ce3+		18.2063	33.0414	98.2755	30.1333	8.65079	33.0403	48.0061	15.5148	86.6355	49.9818	39.1147	31.0744		137.354	153.683	91.4356	102.943	86.7132	66.8119	53.5667	56.7012	110.528	41.157	64.0953	122.962		26.0059	14.5704	47.5706	42.216	19.2603	36.774	40.3962	20.6197	97.6084	17.8419	40.8813	6.11468		10.4903	15.057	11.9267	10.2243	8.25688	10.6887	76.5367	13.9112	10.4283
TZrnTi (oC)		763.444	694.893	763.011	812.858	789.328	727.287	793.433	774.171	748.759	748.123	755.739	755.963		774.638	653.129	618.351	681.844	761.288	701.749	675.436	597.167	735.719	664.78	712.582	787.535		755.751	786.998	756.36	837.169	824.037	807.636	822.771	782.3	731.105	807.854	702.031	793.635		812.632	783.329	814.486	793.167	786.7	814.678	789.085	777.31	788.161
"-": below detection limit; "n.a.": not analyzed.
1 Eu/Eu* and Ce/Ce* ratios are calculated by EuN/(SmN×GdN)1/2 and CeN/(LaN×PrN)1/2, where element abundances are normalized(N) to chondrite values from Sun and McDonough (1989);
2 Ce4+/Ce3+ ratios are calculated using the equation after Ballard et al. (2002).
3 Ti-in-zircon temperatures (TzrnTi) are calculated using the equation after Ferry and Watson (2007).
[truncated: 1 more columns]
